# Supplementary material for: Increase in tropical cyclone rain rate with translation speed
Source: Springer Nature journal article supplement (doi:10.1038/s41467-022-35113-8), 2022-11-28
Supplement: 41467_2022_35113_MOESM1_ESM.pdf [file 41467_2022_35113_MOESM1_ESM.pdf]

# Supplementary Information

## Increase in Tropical Cyclone Rain Rate with Translation Speed

Shifei Tu<sup>1,2,3</sup>, Johnny C. L. Chan<sup>4,5,6\*</sup>, Jianjun Xu<sup>1,3\*</sup>, Quanjia Zhong<sup>7</sup>,  
Wen Zhou<sup>4,8</sup>, Yu Zhang<sup>1,2</sup>

<sup>1</sup> China Meteorological Administration-Guangdong Ocean University (CMA-GDOU)  
Joint Laboratory for Marine Meteorology & South China Sea Institute of Marine Meteorology,  
Guangdong Ocean University; Zhanjiang, China.

<sup>2</sup>College of Ocean and Meteorology, Guangdong Ocean University; Zhanjiang, China.

<sup>3</sup>Shenzhen Institute of Guangdong Ocean University; Shenzhen, China.

<sup>4</sup>Low-Carbon and Climate Impact Research Centre, School of Energy and Environment,  
City University of Hong Kong; Hong Kong, China.

<sup>5</sup>Shanghai Typhoon Institute, China Meteorological Administration, Shanghai, China.

<sup>6</sup>Asia-Pacific Typhoon Collaborative Research Center, Shanghai, China.

<sup>7</sup>State Key Laboratory of Numerical Modeling for Atmospheric Sciences and Geophysical  
Fluid Dynamics (LASG), Institute of Atmospheric Physics, Chinese Academy of Sciences;  
Beijing, China.

<sup>8</sup>Department of Atmospheric and Oceanic Sciences, Institute of Atmospheric Sciences,  
Fudan University; Shanghai, China.

\*Corresponding authors. Email: [johnny.chan@cityu.edu.hk](mailto:johnny.chan@cityu.edu.hk) & [jxu@gdou.edu.cn](mailto:jxu@gdou.edu.cn)

This PDF contains Supplementary Table 1 and Supplementary Figures 1-12.

26 **Supplementary Table 1 | Statistics of tropical cyclone (TC) rain rate with TC**  
 27 **translation speed for various regions, TC intensities, and latitudinal belts.**  
 28 “Growth rate” is the linear trend of rain rate change with TC translation speed, “P-  
 29 value” represents the significance of these linear trends, and “Difference” represents  
 30 the differences in average rain rate between fast- and slow-moving TCs (i.e., 1-5 kt  
 31 and 16-20 kt, respectively; see Methods). The growth rates and differences are  
 32 calculated globally, in the two hemispheres (NH: Northern Hemisphere, SH: Southern  
 33 Hemisphere), in individual basins (WNP: western North Pacific, ENP: eastern North  
 34 Pacific, NA: North Atlantic, SI: South Indian Ocean, SP: South Pacific, NI: North  
 35 Indian Ocean), over the ocean and land, and also with different TC intensities (i.e.,  
 36 TDs: tropical depressions, TSs: tropical storms, CAT12: category 1-2, and CAT35:  
 37 category 3-5) and in different latitudinal belts (5-15°, 15-25°, 25-35°, 35-45°), 5-15°  
 38 represents the latitudinal belts of 5-15°S and 5-15°N, and similarly for 15-25°, 25-  
 39 35°, and 35-45°. The statistics of the rainy-pixels average and all-pixels average are  
 40 both listed.

|               | Rainy-pixels average                       |          |                   | All-pixels average                         |          |                   |
|---------------|--------------------------------------------|----------|-------------------|--------------------------------------------|----------|-------------------|
|               | Growth rate<br>(mm h <sup>-1</sup> per kt) | P-value  | Difference<br>(%) | Growth rate<br>(mm h <sup>-1</sup> per kt) | P-value  | Difference<br>(%) |
| <b>Global</b> | 0.044 ± 0.003                              | < 0.0001 | 24                | 0.029±0.003                                | < 0.0001 | 33                |
| <b>NH</b>     | 0.042 ± 0.003                              | < 0.0001 | 22                | 0.028±0.004                                | < 0.0001 | 31                |
| <b>SH</b>     | 0.056 ± 0.004                              | < 0.0001 | 30                | 0.034±0.003                                | < 0.0001 | 40                |
| <b>WNP</b>    | 0.042 ± 0.004                              | < 0.0001 | 21                | 0.025±0.004                                | < 0.0001 | 27                |
| <b>ENP</b>    | 0.033 ± 0.008                              | 0.0003   | 19                | 0.030±0.005                                | < 0.0001 | 36                |
| <b>NA</b>     | 0.042 ± 0.004                              | < 0.0001 | 23                | 0.027±0.004                                | < 0.0001 | 32                |
| <b>SI</b>     | 0.069 ± 0.006                              | < 0.0001 | 37                | 0.042±0.004                                | < 0.0001 | 49                |
| <b>SP</b>     | 0.051 ± 0.005                              | < 0.0001 | 29                | 0.031±0.003                                | < 0.0001 | 40                |
| <b>NI</b>     | 0.033 ± 0.009                              | 0.0017   | 16                | 0.030±0.006                                | 0.0002   | 33                |
| <b>Ocean</b>  | 0.046 ± 0.003                              | < 0.0001 | 24                | 0.030 ± 0.003                              | < 0.0001 | 33                |
| <b>Land</b>   | 0.026 ± 0.004                              | < 0.0001 | 15                | 0.025 ± 0.003                              | < 0.0001 | 35                |
| <b>TDs</b>    | 0.016 ± 0.002                              | < 0.0001 | 9                 | 0.009±0.001                                | < 0.0001 | 13                |
| <b>TSs</b>    | 0.031 ± 0.003                              | < 0.0001 | 16                | 0.016±0.003                                | < 0.0001 | 18                |
| <b>CAT12</b>  | 0.068 ± 0.006                              | < 0.0001 | 33                | 0.051±0.004                                | < 0.0001 | 49                |
| <b>CAT35</b>  | 0.094 ± 0.006                              | < 0.0001 | 42                | 0.064±0.005                                | < 0.0001 | 50                |
| <b>5-15°</b>  | 0.033 ± 0.004                              | < 0.0001 | 17                | 0.026±0.003                                | < 0.0001 | 27                |
| <b>15-25°</b> | 0.056 ± 0.004                              | < 0.0001 | 30                | 0.040±0.004                                | < 0.0001 | 47                |
| <b>25-35°</b> | 0.070 ± 0.006                              | < 0.0001 | 44                | 0.046±0.003                                | < 0.0001 | 72                |
| <b>35-45°</b> | 0.055 ± 0.005                              | < 0.0001 | 41                | 0.017±0.005                                | 0.0054   | 32                |

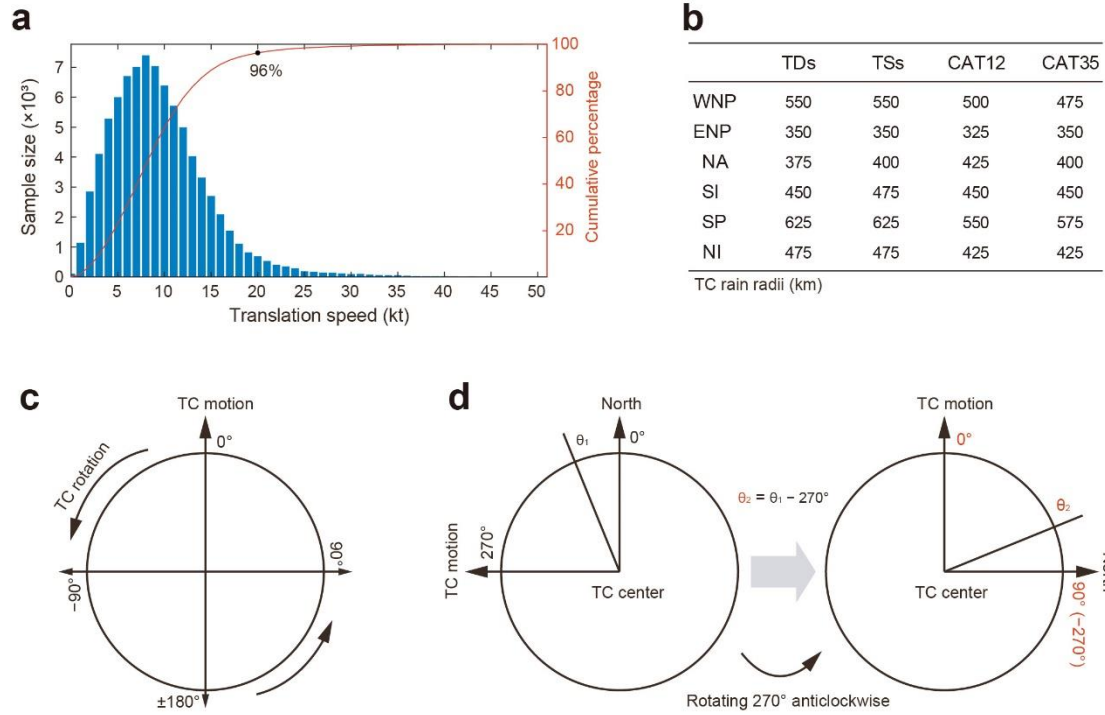

41

42 **Supplementary Fig. 1 | Tropical cyclone (TC) sample size, TC rain radii, and**  
 43 **schematic diagrams on TC coordinate rotation. a**, Sample size of global TCs with  
 44 different translation speed bins (histogram), and the cumulative percentage (red  
 45 curve). **b**, TC rain radius with different TC intensities and TC basins. **c**, Schematic  
 46 diagram of the angles for a translating TC. **d**, Schematic diagram showing coordinate  
 47 rotation (see Methods).

48

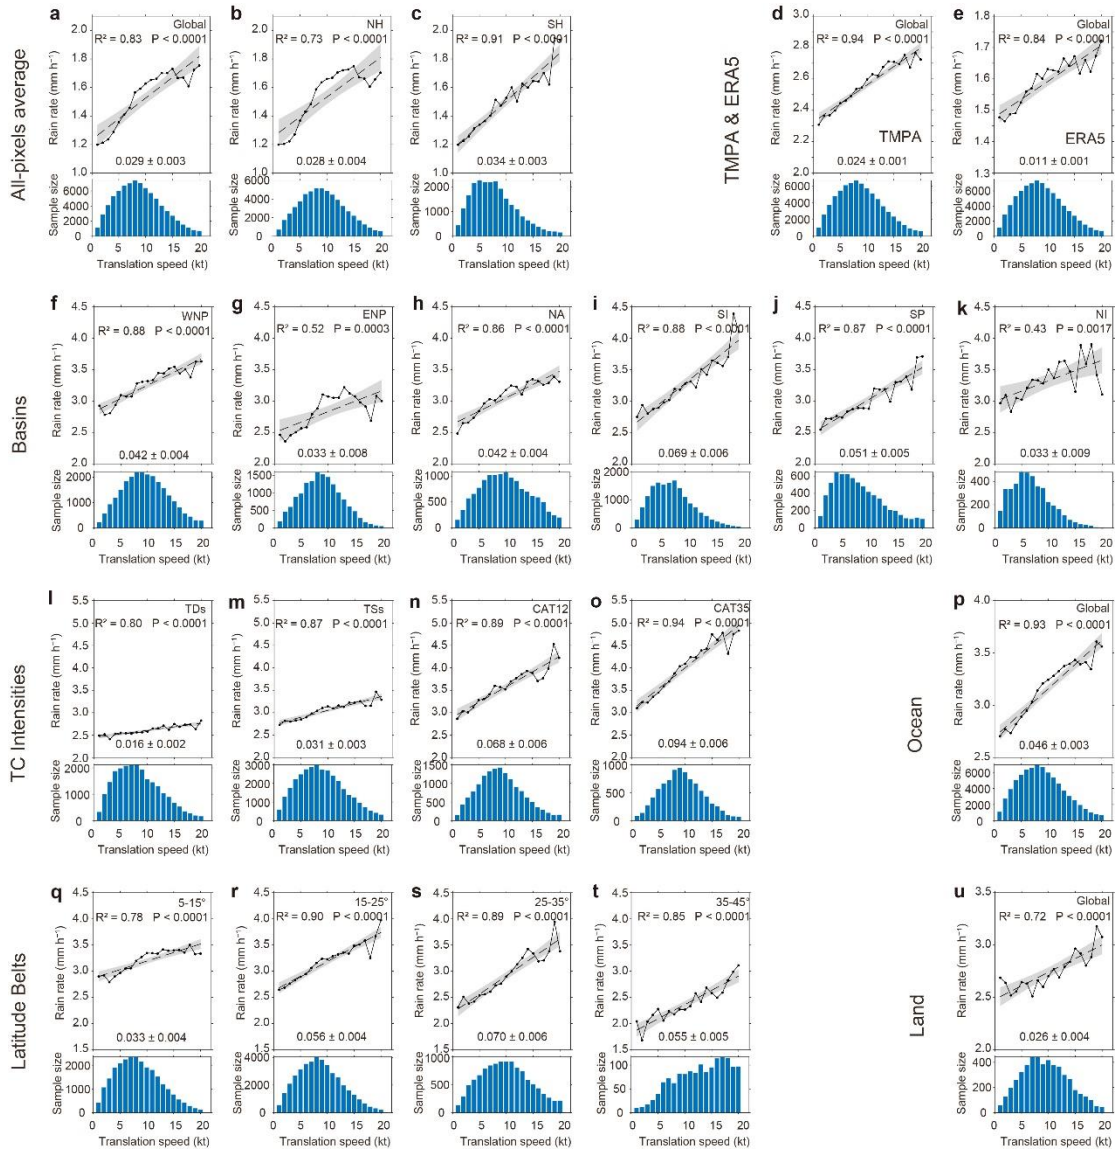

49

50 **Supplementary Fig. 2 | Changes in average tropical cyclone (TC) rain rate with**  
 51 **translation speed.** The all-pixels average rain rate is calculated: **a**, Global, **b**,  
 52 Northern Hemisphere (NH), and **c**, Southern Hemisphere (SH). The rainy-pixels  
 53 average rain rate (globally) is obtained from **d**, the Tropical Rainfall Measuring  
 54 Mission (TRMM) Multi-satellite Precipitation Analysis (TMPA), and **e**, the fifth-  
 55 generation ECMWF (European Centre for Medium-Range Weather Forecasts)  
 56 atmospheric reanalysis (ERA5) data. Rain rate of the rainy-pixels average change  
 57 with translation speed in the six TC basins [**f**, western North Pacific (WNP), **g**, eastern  
 58 North Pacific (ENP), **h**, North Atlantic (NA), **i**, South Indian Ocean (SI), **j**, South  
 59 Pacific (SP), **k**, North Indian Ocean (NI)], with different TC intensities [**l**, tropical  
 60 depressions (TDs), **m**, tropical storms (TSs), **n**, categories 1-2 (CAT12), and **o**,  
 61 categories 3-5 (CAT35)], and **p**, over the ocean and **u**, over land, and in different  
 62 latitudinal belts (**q**, 5-15°, **r**, 15-25°, **s**, 25-35°, **t**, 35-45°). The label 5-15° represents  
 63 the latitudinal belts of 5-15°S and 5-15°N, and similarly for 15-25°, 25-35°, and 35-  
 64 45°. The shaded area in all panels indicates the two-sided 95% confidence levels of

65 the trend, and the dashed lines represent the linear regression of the rain rate with TC  
66 translation speed. The numbers under the curve represent the growth rate. All linear  
67 trends are significant at the 99% confidence level. All average rain rates are obtained  
68 from the Integrated Multi-satellite Retrievals from the Global Precipitation  
69 Measurement (IMERG) final precipitation dataset except **d-e**, which are obtained  
70 from TMPA and ERA5 data. The bar chart in each sub-figure represents the  
71 distribution of TC samples.

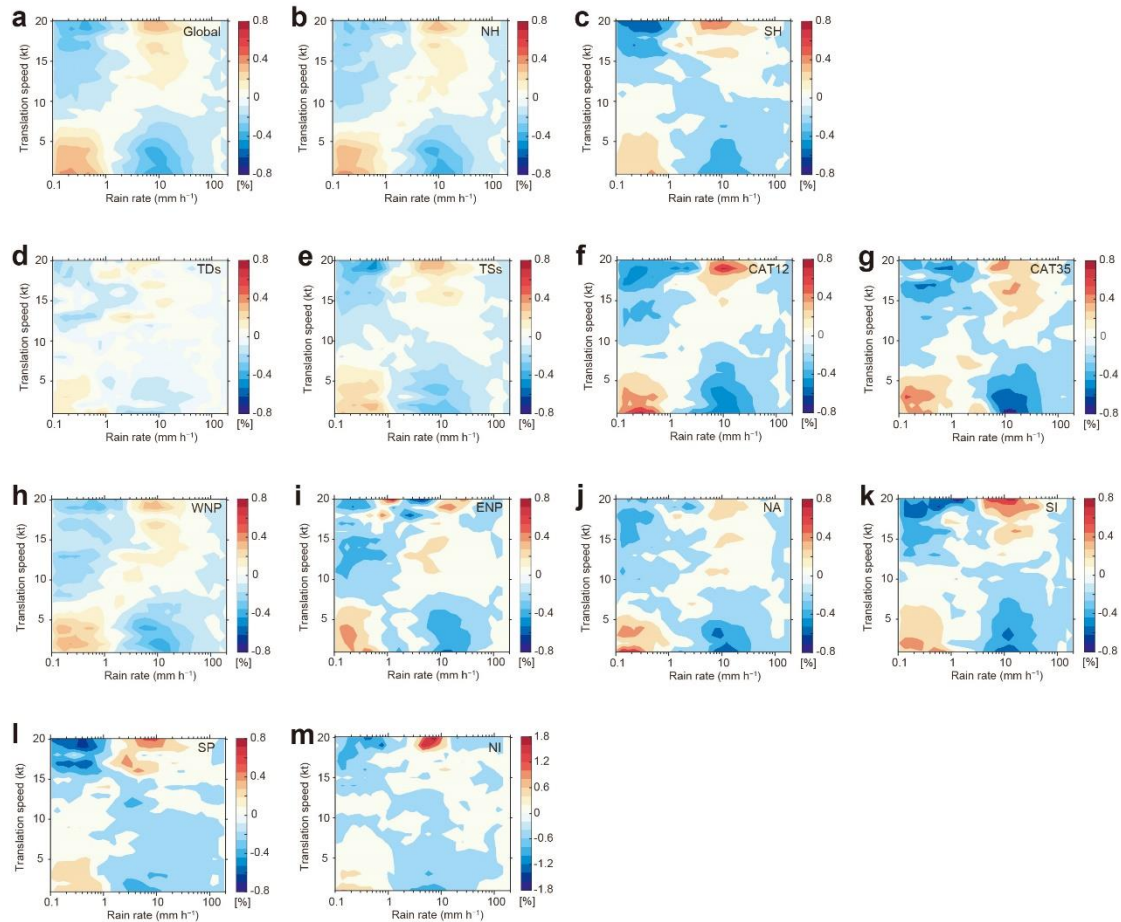

72

73 **Supplementary Fig. 3 | Probability anomalies of tropical cyclone (TC) rain rate**  
 74 **with translation speed. a**, Global, **b**, Northern Hemisphere (NH), **c**, Southern  
 75 Hemisphere (SH), different TC intensities [**d**, tropical depressions (TDs), **e**, tropical  
 76 storms (TSs), **f**, categories 1-2 (CAT12), and **g**, categories 3-5 (CAT35)], and different  
 77 TC basins [**h**, western North Pacific (WNP), **i**, eastern North Pacific (ENP), **j**, North  
 78 Atlantic (NA), **k**, South Indian Ocean (SI), **l**, South Pacific (SP), **m**, North Indian  
 79 Ocean (NI)]. Warm colors indicate the increased probability.

80

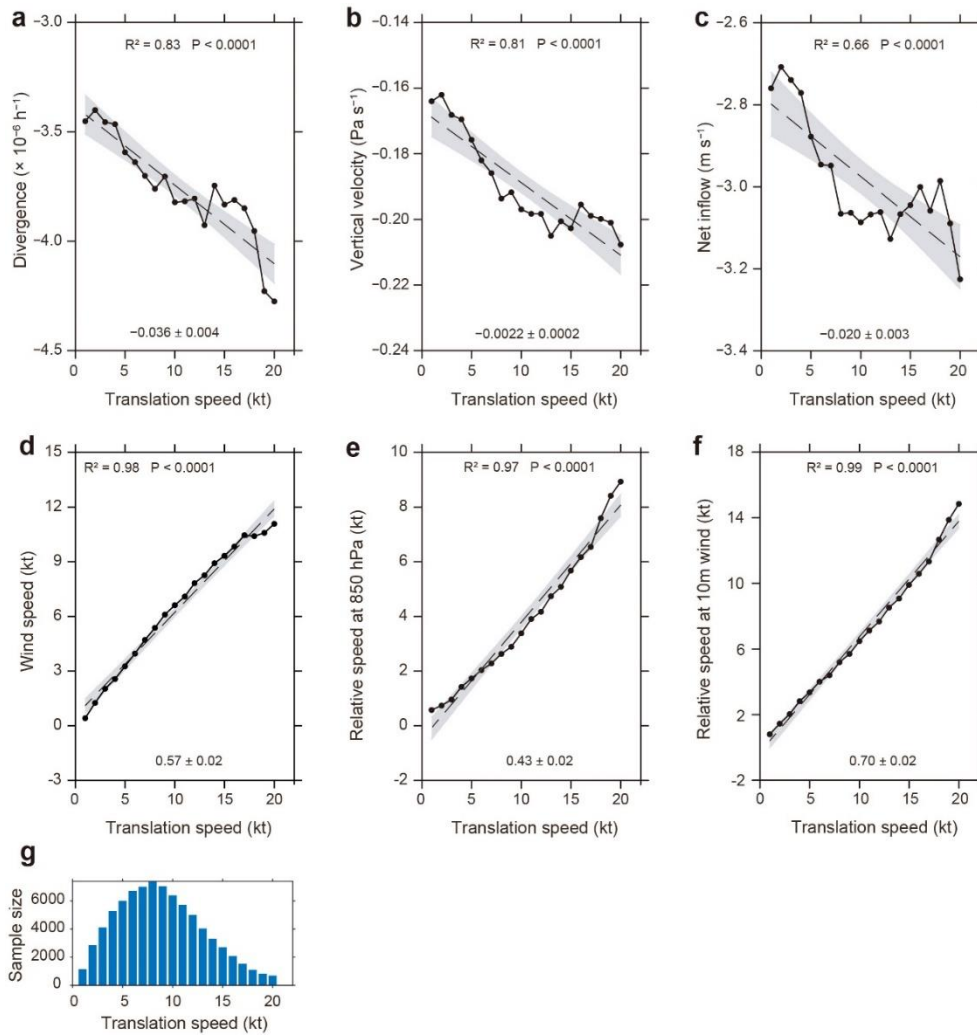

81

82 **Supplementary Fig. 4 | Changes in the different variables with translation speed.**

83 **a**, Divergence at 850 hPa. **b**. Omega (i.e., vertical velocity) at 500 hPa. **c**, Low-level  
84 net inflow at 10 m. **d**, Surrounding lower-tropospheric flow (850 hPa, see Methods).  
85 **e**, Relative speed at 850 hPa. **f**, Relative speed at 10 m. **g**, Tropical cyclone (TC)  
86 samples distribution of **a-f**. All these different variables are calculated over the whole  
87 TC region. Definitions can be found in Methods. The shaded area in all panels  
88 indicates the two-sided 95% confidence levels of the trends, the dashed lines represent  
89 the linear regression of the rain rate with TC translation speed, and the numbers under  
90 the curve represent the growth rate. All linear trends are significant at the 99%  
91 confidence level.

92



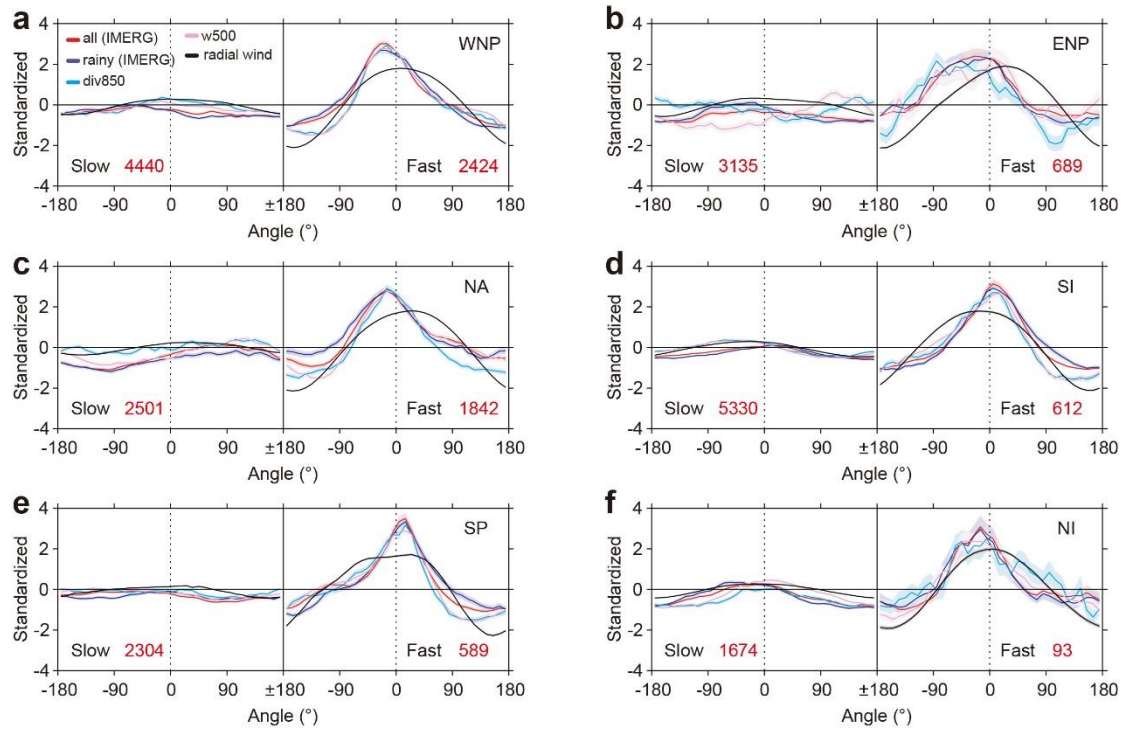

93

94 **Supplementary Fig. 5 | Azimuthal distribution of different variables.** Left and  
 95 right panels in each sub-figure represent these variables in slow- and fast-moving  
 96 tropical cyclones (TCs), respectively. **a**, western North Pacific (WNP), **b**, eastern  
 97 North Pacific (ENP), **c**, North Atlantic (NA), **d**, South Indian Ocean (SI), **e**, South  
 98 Pacific (SP), **f**, North Indian Ocean (NI). The x-axis represents different angles, as in  
 99 the schematic diagram shown in Supplementary Fig. 1c; “0” represents the direction  
 100 of TC motion, “±180” represents the reverse of TC motion, and clockwise is positive.  
 101 Colors are for different standardized variables: all-pixels average (red) and rainy-  
 102 pixels average (purple) in TC rain rate, vertical velocity at 500 hPa (pink, upward is  
 103 positive), divergence at 850 hPa (blue, convergence is positive), and radial wind at 10  
 104 m (black, inflow is positive). Shaded areas in each sub-figure represent the standard  
 105 error. Red numbers indicate the sample sizes used in each plot.



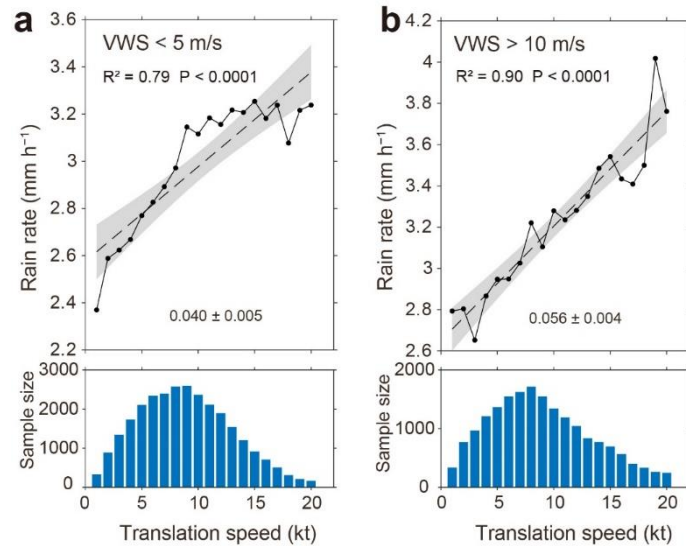

106

107 **Supplementary Fig. 6 | Changes in average tropical cyclone (TC) rain rate with**  
 108 **translation speed under the different VWS conditions. a, weak VWS (< 5 m/s), b,**  
 109 **strong VWS (>10 m/s).** The shaded area in all panels indicates the two-sided 95%  
 110 confidence levels of the slopes, the numbers under the curve represent the growth rate,  
 111 and the dashed lines represent the linear regression of the rain rate with TC translation  
 112 speed. All linear trends are significant at the 99% confidence level. The bar chart in  
 113 each sub-figure represents the distribution of TC samples.

114

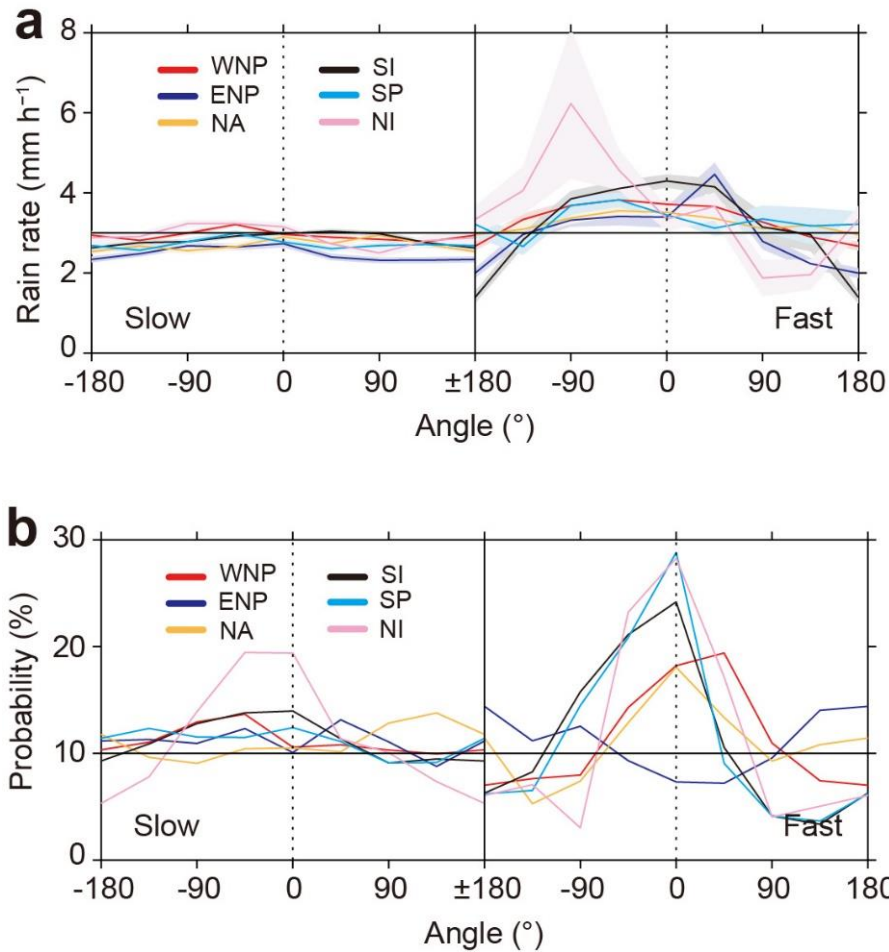

115

116 **Supplementary Fig. 7 | Azimuthal distributions of two variables with different**  
 117 **vertical wind shear (VWS) directions. a**, tropical cyclone (TC) rain rate, and **b**, the  
 118 probability of VWS. Left and right panels in each sub-figure represent these variables  
 119 in slow- and fast-moving TCs, respectively. The x-axis is the difference between the  
 120 TC motion direction and the shear direction, “0” represents that the directions of  
 121 VWS and TC motion are the same, “±180” represents the directions of VWS and TC  
 122 motion are opposite, and clockwise is positive. Colors represent the different TC  
 123 basins: western Northern Pacific (WNP, red), eastern North Pacific (ENP, purple),  
 124 North Atlantic (NA, orange), Southern Indian Ocean (SI, black), South Pacific (SP,  
 125 blue), and North Indian Ocean (NI, pink). Shaded areas in (a) represent the standard  
 126 error. The sample sizes of each plot are the same as in Supplementary Fig. 5.

127

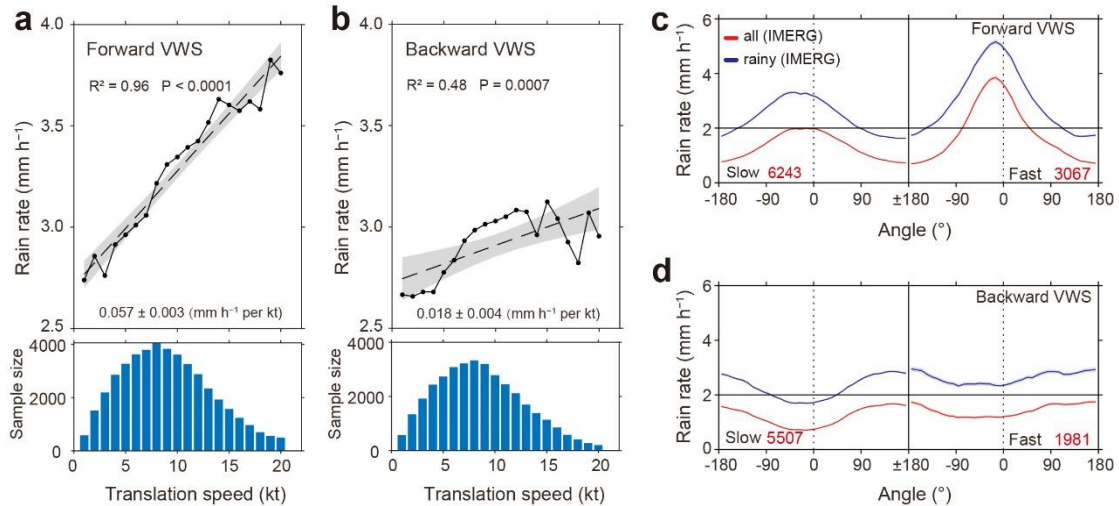

128

129 **Supplementary Fig. 8 | Analysis of tropical cyclone (TC) rain rate and vertical**  
 130 **wind shear (VWS).** **a**, Changes in the average TC rain rate with translation speed  
 131 under forward VWS, **b**, Same as **a**, but for backward VWS. The shaded areas in **a-b**  
 132 indicate the two-sided 95% confidence levels of the trends, and the dashed lines  
 133 represent the linear regression of the rain rate with TC translation speed. The linear  
 134 trends in **a-b** are significant at the 99% confidence level, and the numbers under the  
 135 curve represent the growth rate. The bar chart in **a-b** represents the distribution of TC  
 136 samples. **c**, Azimuthal distribution of rain rate in the Northern Hemisphere (NH) from  
 137 the Integrated Multi-satellite Retrievals from the Global Precipitation Measurement  
 138 (IMERG) final precipitation under forward VWS, red for all-pixels average and blue  
 139 for rainy-pixels average. **d**, Same as **c**, but for backward VWS. Left and right panels  
 140 in **c-d** represent rain rate in slow- and fast-moving TCs, respectively; the x-axis  
 141 represents different angles, as in the schematic diagram shown in Supplementary Fig.  
 142 1c; “0” represents the direction of TC motion, “±180” represents the reverse of TC  
 143 motion, and clockwise is positive. Red numbers in **c-d** indicate the sample sizes used  
 144 in each plot.

145

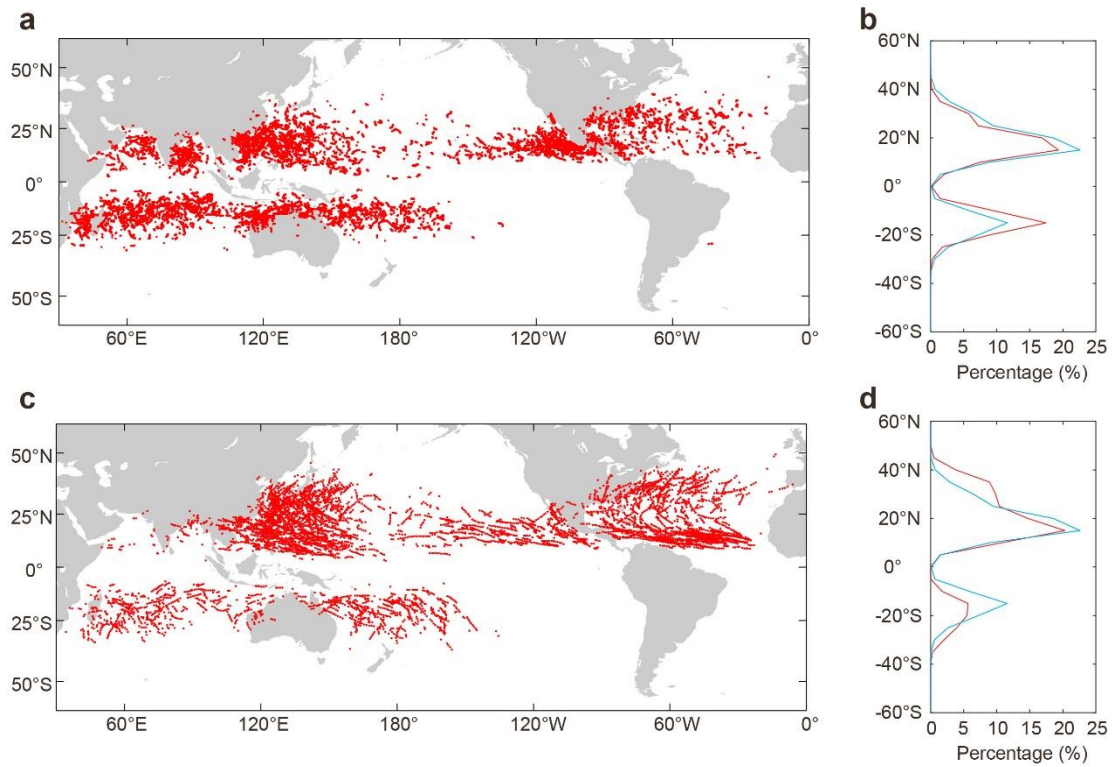

146

147 **Supplementary Fig. 9 | Geographical distributions of tropical cyclone (TC)**  
 148 **samples. a**, Geographical distribution of slow-moving TCs. **b**, Probability  
 149 distributions of slow-moving TC samples at different latitudes (red curve). **c**, Same as  
 150 **a**, but for fast-moving TCs. **d**, Same as **b**, but for fast-moving TCs. Blue curves in **b**  
 151 and **d** represent the probability distributions of all TC samples. Each probability is  
 152 calculated in a 5° latitudinal bin.

153

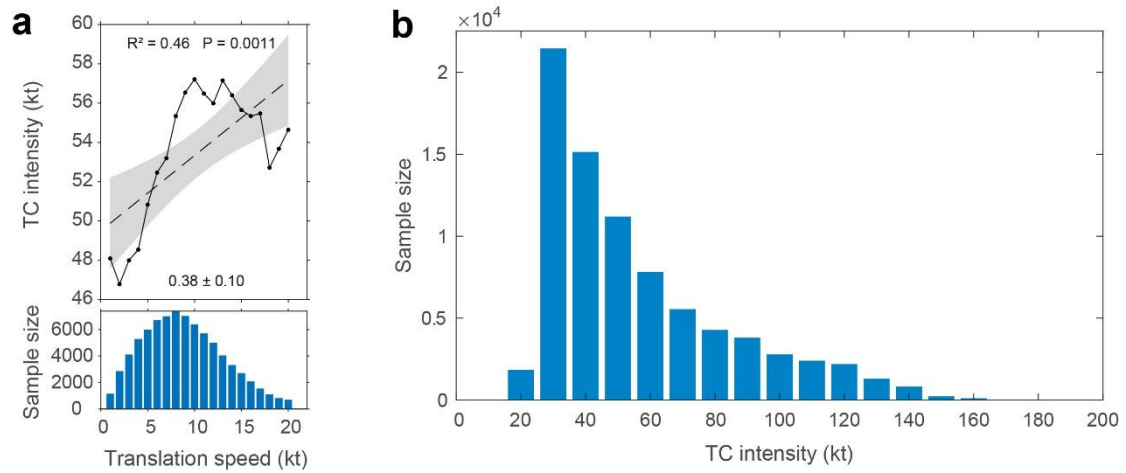

154

155 **Supplementary Fig. 10 | Analysis of tropical cyclone (TC) intensity.** **a**, Average TC  
 156 intensity changes with translation speed. The shaded area indicates the two-sided 95%  
 157 confidence levels of the trends, and the dashed lines represent the linear regression of  
 158 the rain rate with TC translation speed. The numbers under the curve represent the  
 159 growth rate. The bar chart represents the distribution of TC samples. **b**, The sample  
 160 size distribution of TC intensity rounding into the 10 kt bins.

161

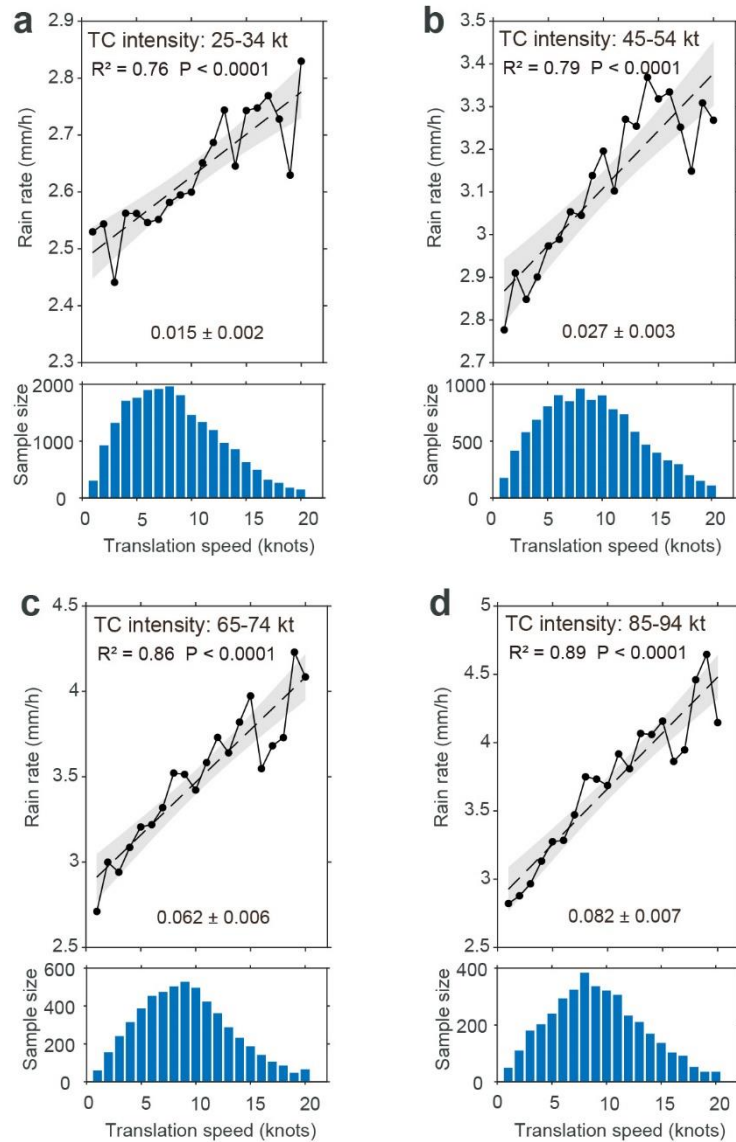

162

163 **Supplementary Fig. 11 | Rain rate and influence factors of the same tropical**  
 164 **cyclone (TC) intensity change with translation speed.** The four columns from left  
 165 to right indicate those samples with TC intensity of **a.** 25-34 kt, **b.** 45-54 kt, **c.** 65-74  
 166 kt, and **d.** 85-94 kt, respectively. TC rain rate from the Integrated Multi-satellite  
 167 Retrievals from the Global Precipitation Measurement (IMERG) final precipitation  
 168 data. The shaded areas indicate the two-sided 95% confidence levels of the trends, the  
 169 dashed lines represent the linear regression of the rain rate with TC translation speed,  
 170 and the numbers under the curve represent the growth rate. All the linear regressions  
 171 are significant (99% confidence level). The bar chart in each sub-figure represents the  
 172 distribution of TC samples.

173

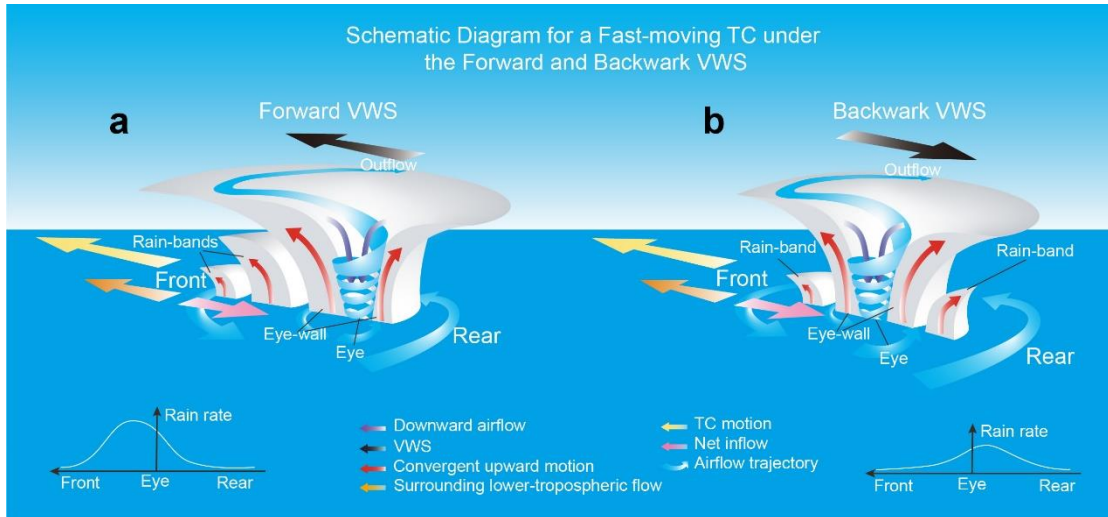

174

175 **Supplementary Fig. 12 | Schematic diagrams of the fast-moving tropical cyclones**  
 176 **(TCs). a**, the forward vertical wind shear (VWS) condition, and **b**, the backward  
 177 VWS condition. The legends of colored arrows are listed at the lower of this figure.  
 178 The white curves are the schematic diagram for the front-rear section of the rain rate  
 179 composite of the slow- and fast-moving TCs.

180

181
